# Supplementary material
Source: Springer Nature journal article supplement (https://www.springermedizin.de/resource/supplementary/12967_2012_1506_MOESM6_ESM.pdf/9574214)

Figure 2c. Eosinophils have no significant effect on the proportion of IL-2 expressing CD4 T cells.

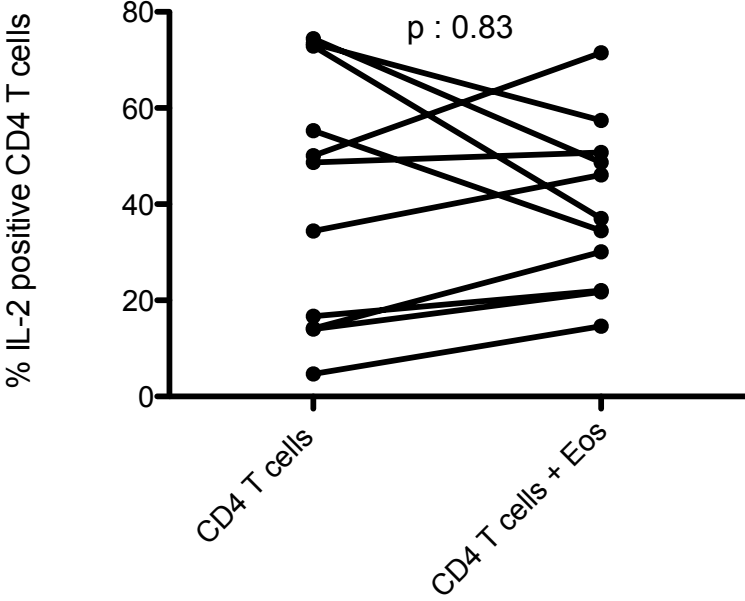

Supplement: MOESM6 [file 9574214]
